# Supplementary material for: Crystallization of smooth amorphous calcium phosphate microspheres to core–shell hydroxyapatite microspheres
Source: Royal Society of Chemistry journal article supplement (doi:10.1039/d4ra04078c), 2024-01-01
Supplement: d4ra04078c1.pdf [file d4ra04078c1.pdf]

## Supporting Information

# Crystallization of smooth amorphous calcium phosphate microspheres to core-shell hydroxyapatite microspheres

*Mei-li Qi*<sup>1,2</sup>, *Zhaoxuan Long*<sup>1</sup>, *Xiao-Cun Liu*<sup>1,2</sup>, *Haijun Zhang*<sup>3</sup>, *Jin Li*<sup>1,2\*</sup> and *Shengkun*

*Yao*<sup>4,5\*</sup>

<sup>1</sup> School of Transportation Civil Engineering, Shandong Jiaotong University, Ji'nan 250357, China

<sup>2</sup> Jinan Key Laboratory for Low-Carbon and Eco-Friendly Road Materials, Shandong Jiaotong University, Ji'nan 250357, China

<sup>3</sup> Shanghai Tenth People's Hospital, School of Medicine, Tongji University, Shanghai 200092, China

<sup>4</sup> Shandong Provincial Engineering and Technical Center of Light Manipulations and Shandong Provincial Key Laboratory of Optics and Photonic Device, School of Physics and Electronics, Shandong Normal University, Ji'nan 250014, China

<sup>5</sup> Collaborative Innovation Center of Light Manipulation and Applications, Shandong Normal University, Ji'nan 250358, China

## AUTHOR INFORMATION

**Corresponding Author: Jin Li and Shengkun Yao**

\*E-mail: [sdzbljin@163.com](mailto:sdzbljin@163.com) and [yaoshk@sdnu.edu.cn](mailto:yaoshk@sdnu.edu.cn)

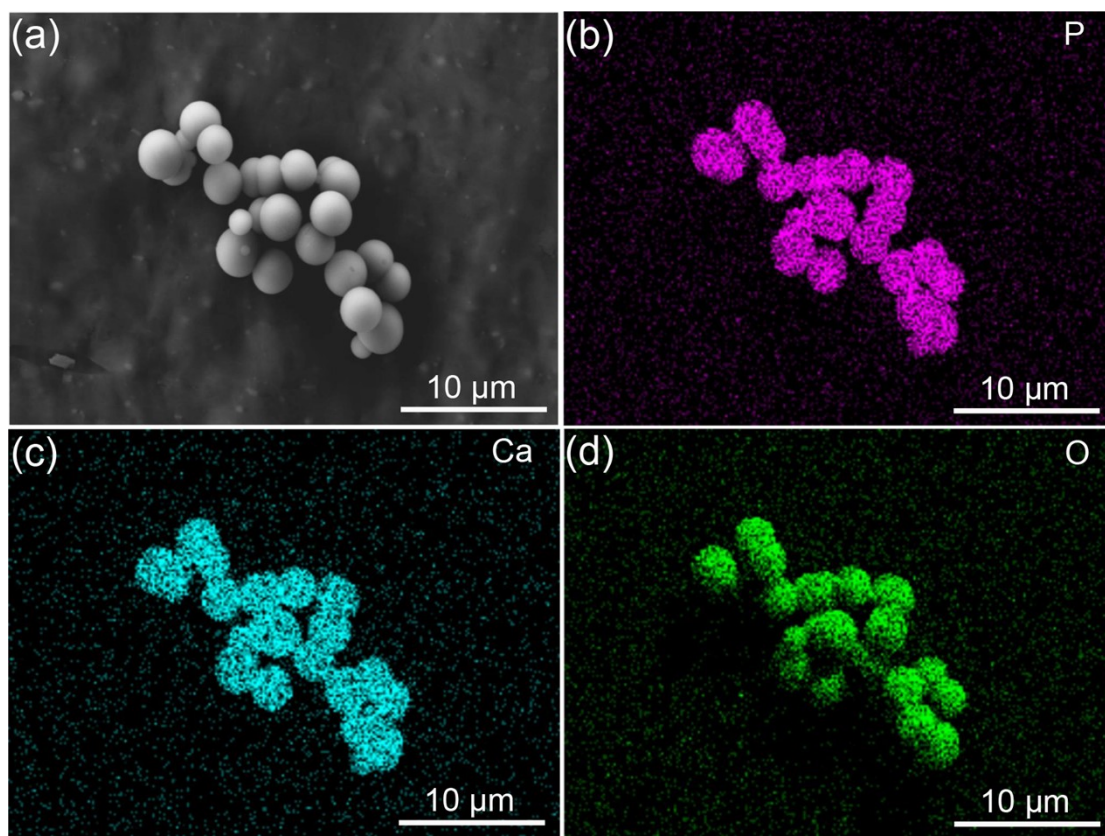

Figure S1. EDS mapping of the ACP microspheres prepared under different hydrothermal treatment of 0.5 h.

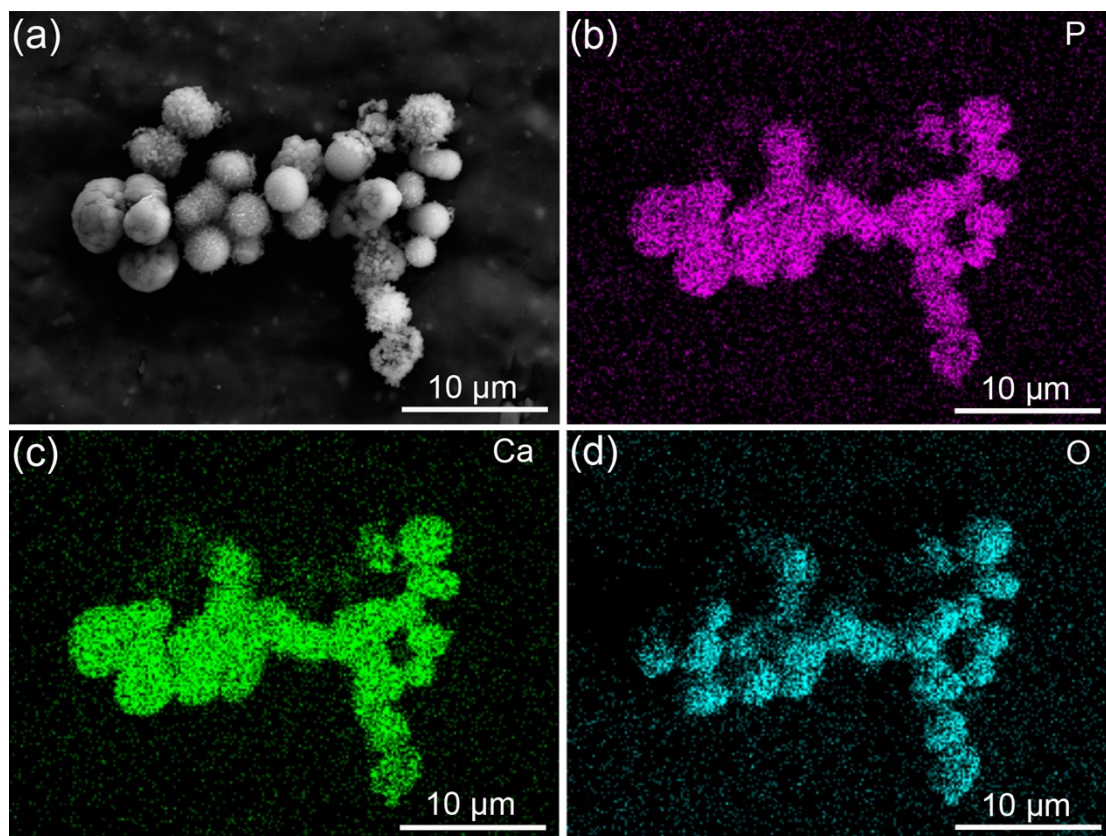

Figure S2. EDS mapping of the HA microspheres prepared under different hydrothermal treatment of 2 h.
